# Supplementary material for: Gonadal transcriptome sequencing of the critically endangered Acipenser dabryanus to discover candidate sex-related genes
Source: PeerJ. 2018 Jul 27;6:e5389. doi: 10.7717/peerj.5389 (PMC6065465; doi:10.7717/peerj.5389)
Supplement: Supplemental Information 3 — Significantly matched genes were highlighted in bold. [file peerj-06-5389-s003.xls]

## Sheet: Sheet1
Gene symbol	Gene name	GenBank Accession
bmp15	bone morphogenetic protein 15	NM_001020484.1
cyp11b	11b-hydroxylase	FJ713103
cyp17a1	cytochrome P450, family 17, subfamily A, member 1	AB292401
cyp17a2	cytochrome P450, family 17, subfamily A, member 2	EF423917
dmc1	DNA meiotic recombinase 1	NM_001020782.1
dmrt1	double sex and mab-3 related transcription factor 1	NM_205628.2
esr1	estrogen receptor alpha	NM_152959.1
foxl2	forkhead box L2	NM_001045252.2
fshr	follicle-stimulating hormone receptor	NM_001001812.1
gnrhr	gonadotropin-releasing hormone receptor	NM_001292904.1
gsdf	gonadal soma derived factor	NM_001114668.1
hsd17b8	17β-Hydroxysteroid dehydrogenase type 8	AY663855
hsd3b1	Type I 3β-hydroxysteroid dehydrogenase/Δ5-Δ4-isomerase	EU827279
igf-I	insulin-like growth factor I	NM_131825.2
igfIr	insulin-like growth factor I receptor	NM_152969.1
lhx1	LIM homeobox 1	XM_003978421.1
oct4 (pou2)	octamer binding protein 4 (class V POU family gene 2)	NM_131112.1
rspo-1	R-spondin homologue 1	NM_001002352.1
sox1	SRY (sex determining region Y)-box 1	XM_003977903.1
sox3	SRY (sex determining region Y)-box 3	NM_001001811.2
sox4	SRY (sex determining region Y)-box 4	XM_007903169.1
sox6	SRY (sex determining region Y)-box 6	NM_001123009.1
sox9	Sry box-containing gene 9	NM_001124270.1
spo11	meiotic protein covalently bound to DSB	NM_205682.1
star	Steroidogenic acute regulatory protein	XM_007911050.1
wnt4	Wingless-type MMTV integration site family member 4	XM_007897905.1
wt1	Wilms tumor 1	NM_001173778.1
amh	anti-mullerian hormone	NM_001007779.1
amhr2	anti-mullerian hormone receptor 2	XM_008320643.2
ar1	androgen receptor alpha	NM_001279613.1
ar2	androgen receptor beta	AB045212
atrx	alpha thalassemia/mental retardation syndrome X-linked	NM_200653.2
ctnnb1	catenin b-1	XM_017351314.1
cyp11a1	cytochrome P450, family 11, subfamily A, polypeptide 1	NM_152953.2
cyp19a1a	testicular P450 aromatase	NM_131154.3
cyp19a1b	cytochrome P450, family 19, subfamily A, polypeptide 1b.	NM_131642.1
dax1	Nr0b1, nuclear receptor subfamily 0, group B, member 1	NM_001110789.1
dhh	desert hedgehog	NM_001030115.1
dmrt3	double sex and mab-3 related transcription factor 3	XM_007892623.1
dmrt5	doublesex- and mab-3-related transcription factor 5	NM_001037950.1
emx2	empty spiracles homeobox 2	NM_131280.2
esr2a	estrogen receptor beta 1	NM_180966.2
esr2b	estrogen receptor beta 2	NM_174862.3
fem1a	fem-1 homolog a (C. elegans)	NM_199837.1
fgf9	fibroblast growth factor 9	XM_009304658.2
fgfr2	fibroblast growth factor receptor 2	NM_001243004.1
fhl3	four and a half LIM domains 3	XM_011605055.1
fst	follistatin	NM_001160483.1
gata4	GATA-binding protein 4	NM_131236.2
gnrh	gonadotropin-releasing hormone	NM_001123667.1
fsh	follicle-stimulating hormone	NM_205624.1
hsd11b2	11β-Hydroxysteroid dehydrogenase type 2	AY190043
hsd17b1	17β-Hydroxysteroid dehydrogenase type 1	AY663853
hsd17b12a1	17β-Hydroxysteroid dehydrogenase type 12a1	XM_003455397
hsd17b12a2	17β-Hydroxysteroid dehydrogenase type 12a2	XM_003450799
hsd17b14	17β-Hydroxysteroid dehydrogenase type 14	XM_003442518
hsd3b2	Type II 3β-hydroxysteroid dehydrogenase/Δ5-Δ4-isomerase	EU827281
hsp70	heat-shock protein 70	NM_001200273.1
lhx9	LIM homeobox 9	NM_001017710.2
nanos1	nanos homolog 1	XM_017462216
nanos2	nanos homolog 2	NM_131878.1
pdgf	Platelet-derived growth factor	NM_131459.2
pdgfr-β	Platelet-derived growth factor receptor beta	XM_011610662.1
sdY	sexually dimorphic gene on the Y chromosome	NM_001281416.1
sf-1	Steroidogenic Factor 1 (nuclear receptor subfamily 5, group A, member 1)	NM_212653.1
snip1	Smad nuclear interacting protein 1	XM_007906748.1
sox11	SRY-box containing gene 11	XM_011617887.1
sox14	SRY (sex determining region Y)-box 14	NM_001037680.1
sox17	SRY (sex determining region Y)-box 17	NM_131287.2
zp	zona pellucida sperm-binding protein	XM_015339916.1
spata4	spermatogenesis-associated protein 4	XM_006630087.2
spata7	spermatogenesis-associated protein 7	XM_014489975.1
spata17	spermatogenesis-associated protein 17	NM_001142264.1
